# Supplementary material for: Evaluating Large Language Models for Quality Control in Research Ethics Review
Source: Research Square preprint supplement (doi:10.21203/rs.3.rs-6417944/v1), 2025-04-21
Supplement: Supplementary file 1 [file 322ce519113f82f33fc115bd.docx]

**Supplementary Note**

This section provides a list of the commands used to assess the performance of Large Language Models (LLMs) in evaluating research ethics documentation:

1. Verify that all acronyms and abbreviations are defined upon their first appearance in the document. Provide a list of all instances where this has not been done, including page references for each occurrence.
2. Confirm that British English conventions have been consistently applied throughout the document. Provide a list of all instances where other variants of English are used, including a page reference for each occurrence.
3. Verify if the document includes an invitation to participate, detailing the reasons for the individual's invitation, and provide the excerpt
4. Verify if the document includes a description and aims of the study and provide the excerpt.
5. Verify if the document includes a section that details who is invited to participate and the reasons for their invitation, and provide the excerpt.
6. Verify if the document includes a section that describes what study participation will involve, and provide the excerpt.
7. Verify if the document includes a section that details the duration of participation in the study, and provide the excerpt.
8. List the locations where the study activities will take place as described in the document.
9. Identify if the document mentions any telephone or virtual appointments and specify the number of each.
10. Determine if the document outlines any face-to-face appointments and state the number of each.
11. Verify the document's section on potential risks and extract it.
12. Confirm the document's section detailing potential benefits and extract it.
13. Check for a section on potential alternatives within the document and extract it.
14. Check for a section explaining the voluntary nature of participation, the right to withdraw, and the withdrawal process, and provide that section.
15. Identify if the document provides contact details for further information about the study and include that section.
16. Verify if the document contains contact details to report complaints or concerns and provide that section.
17. Confirm the presence of a section with general contact details and provide that section.
18. Locate the section containing the Sponsor's Data Protection Officer's contact details and provide it.
19. Identify and list the pages where images or graphics appear, and check if captions or legends are included.
20. Identify and list the pages where videos appear, and check if subtitles and transcripts are provided.
21. Check if the document references the use of a template and include that section.
22. Verify the presence of approved sponsor-specific UK GDPR wording in the document and extract the section where it is mentioned
23. Check if the document includes the name of the sponsor organisation and provide the relevant section.
24. Confirm if the document contains the following specified text, ensuring placeholders like [square brackets], NAME, OTHER, X, or EVENT are appropriately filled:

“How will we use information about you? We will need to use information from [you] [from your medical records] [your GP] [OTHER] for this research project. This information will include your [initials/ NHS number/ name/ contact details/ provide a bullet list of identifiers held by site and/or sponsor for the research]. People will use this information to do the research or to check your records to make sure that the research is being done properly. We will keep all information about you safe and secure. Once we have finished the study, we will keep some of the data so we can check the results. We will write our reports in a way that no-one can work out that you took part in the study.”

Provide the section where this text is mentioned and underline any deviations from the provided template.

1. Verify if the document includes the optional text:

"People who do not need to know who you are will not be able to see your name or contact details. Your data will have a code number instead."

Provide the section where this text appears, if present.

1. Confirm if the document contains the following optional text, ensuring appropriate use of placeholders like [country X]:

“Some of your information will be sent to [country X]. They must follow our rules about keeping your information safe.”

If present, provide the section where this text appears.

1. Verify if the document includes the following text, ensuring placeholders such as [square brackets], NAME, OTHER, X, or EVENT are filled correctly:

“What are your choices about how your information is used? You can stop being part of the study at any time, without giving a reason, but we will keep information about you that we already have. We need to manage your records in specific ways for the research to be reliable. This means that we won't be able to let you see or change the data we hold about you.”

Provide the section where this text is mentioned and underline any deviations from the provided template.

1. Verify if the document contains the optional text, making sure that placeholders like [square brackets] are utilised appropriately:

“If you choose to stop taking part in the study, we would like to continue collecting information about your health from [central NHS records/ your hospital/ your GP]. If you do not want this to happen, tell us and we will stop.”

If present, provide the section where this text appears.

1. Check if the document includes the following optional text, ensuring that placeholders like [square brackets] are correctly filled:

“If you agree to take part in this study, you will have the option to take part in future research using your data saved from this study. [Insert details of any specific bank/ repository]”

If this text is included, provide the section where it appears.

1. Confirm if the document contains the following text, ensuring that placeholders like [square brackets], NAME, OTHER, X, or EVENT are appropriately filled:

“Where can you find out more about how your information is used? You can find out more about how we use your information at [www.hra.nhs.uk/information-about-patients/](http://www.hra.nhs.uk/information-about-patients/), our leaflet available from [X], by asking one of the research team, by sending an email to [email], or by ringing us on [phone number].”

Provide the section where this text is mentioned and underline any deviations from the provided template.

1. If Present: Children PIS Standard Wording

Verify if the document includes details on what will happen to the children's personal data and provide the relevant section.

1. If Present: Summary PIS Standard Wording

Confirm if the document includes the following template text, ensuring that placeholders like [square brackets], NAME, OTHER, X, or EVENT are appropriately filled:

"In this research study we will use information from [you] [your medical records] [your GP] [OTHER]. We will only use information that we need for the research study. We will let very few people know your name or contact details, and only if they really need it for this study. Everyone involved in this study will keep your data safe and secure. We will also follow all privacy rules. At the end of the study we will save some of the data [in case we need to check it] AND/OR [for future research]. We will make sure no-one can work out who you are from the reports we write. The information pack tells you more about this.”

Provide the section where this text is mentioned and underline any words or sentences that differ from the provided template.
